# Supplementary material for: Synthesis and photoelectric properties of new Dawson-type polyoxometalate-based dimeric and oligomeric Pt(ii)-acetylide inorganic–organic hybrids
Source: Royal Society of Chemistry journal article supplement (doi:10.1039/c4dt02504k), 2014-10-15
Supplement: c4dt02504k1.pdf [file c4dt02504k1.pdf]

## **Electronic Supplementary Information**

### **Synthesis and photoelectric properties of new Dawson-type polyoxometalate-based dimeric and oligomeric Pt(II)-acetylide inorganic-organic hybrids**

Li Liu, Lei Hu, Qian Liu, Zu-Liang Du, Fa-Bao Li, Guang-Hua Li, Xun-Jin Zhu, Wai-Yeung Wong, Lei Wang, Hua Li

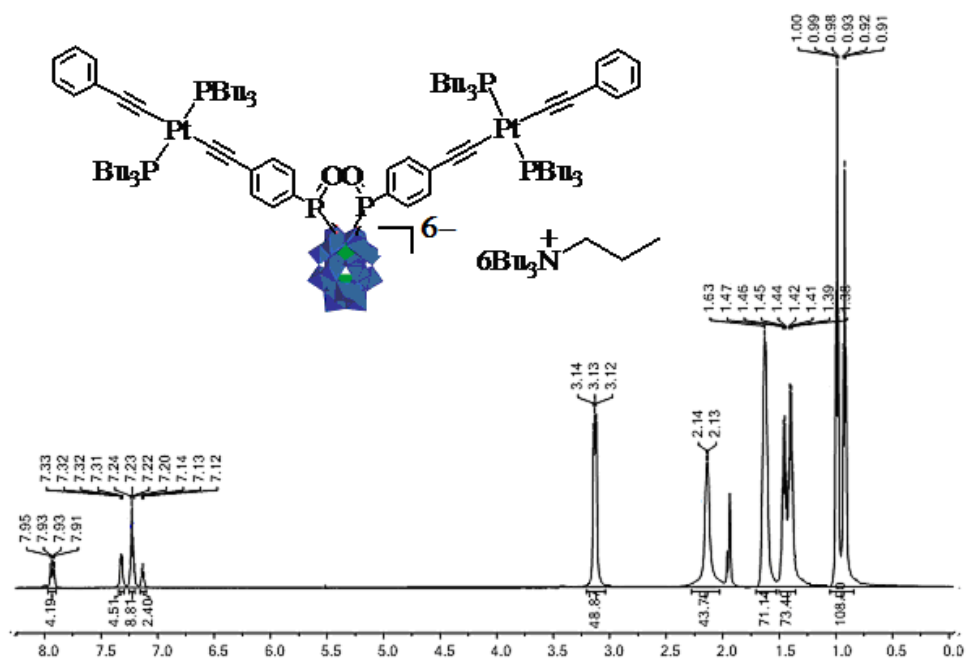

Fig. S1  $^1\text{H}$  NMR spectrum of 2PtOD in  $\text{CD}_3\text{CN}$ .

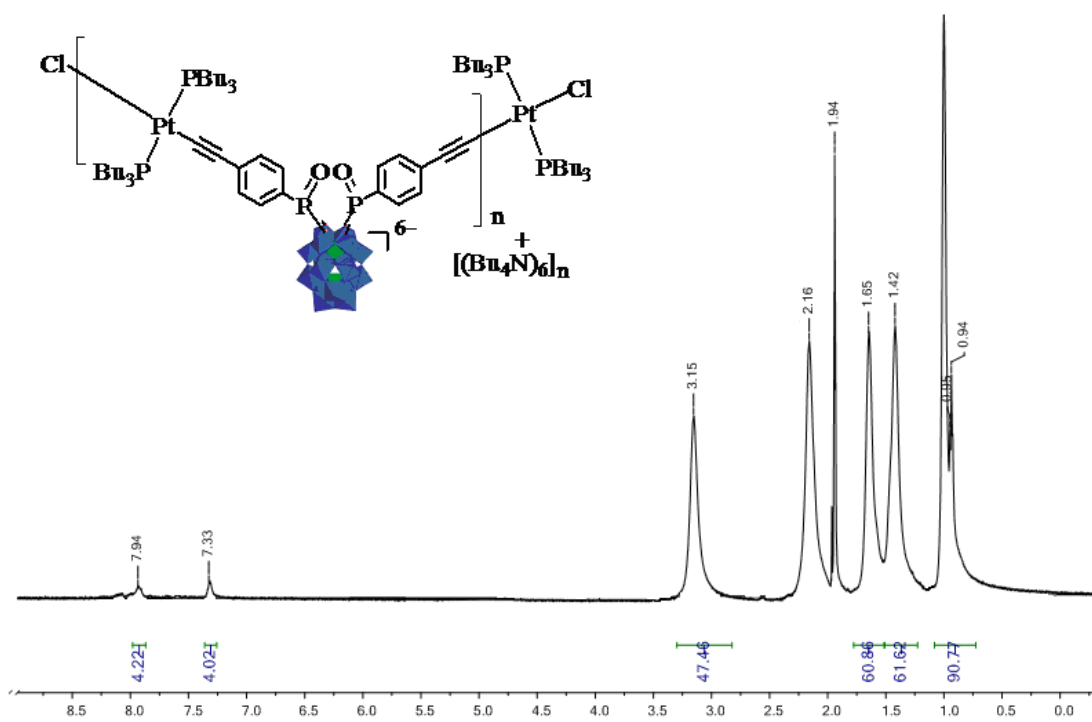

Fig. S2  $^1\text{H}$  NMR spectrum of PPtOD in  $\text{CD}_3\text{CN}$
